# Supplementary material for: Associations of physical activity with gut microbiota in pre-adolescent children
Source: PubMed Central journal article supplement — Phys Act Nutr. 2021 Dec 31;25(4):24–37. doi: 10.20463/pan.2021.0023 (PMC8843867; doi:10.20463/pan.2021.0023), 2021-12-31
Supplement: pan-2021-0023-suppl2.pdf [file pan-2021-0023-suppl2.pdf]

**Supplementary Table 2.** Difference in genera abundance between those who did and did not meet recommendations of 60 or more minutes of daily moderate-to-vigorous physical activity.

| Genus                                | Unadjusted                       |       |                  | Adjusted <sup>b</sup>            |       |                  |
|--------------------------------------|----------------------------------|-------|------------------|----------------------------------|-------|------------------|
|                                      | log <sub>2</sub> FC <sup>a</sup> | SE    | P <sub>FDR</sub> | log <sub>2</sub> FC <sup>a</sup> | SE    | P <sub>FDR</sub> |
| <i>Abiotrophia</i>                   | 0.814                            | 0.508 | 6.19E-01         | 0.737                            | 0.556 | 5.56E-01         |
| <i>Acetanaerobacterium</i>           | 0.187                            | 0.294 | 9.53E-01         | 0.162                            | 0.300 | 9.28E-01         |
| <i>Acidaminococcus</i>               | -2.582                           | 2.938 | 9.53E-01         | -5.415                           | 2.998 | 4.21E-01         |
| <i>Actinomyces</i>                   | -0.226                           | 0.144 | 6.34E-01         | -0.269                           | 0.147 | 4.21E-01         |
| <i>Adlercreutzia</i>                 | -0.475                           | 0.208 | 3.69E-01         | -0.529                           | 0.216 | 1.86E-01         |
| <i>Agathobacter</i>                  | -0.313                           | 0.161 | 5.44E-01         | -0.227                           | 0.163 | 5.25E-01         |
| <i>Akkermansia</i>                   | -0.345                           | 0.576 | 9.55E-01         | -0.321                           | 0.592 | 9.28E-01         |
| <i>Alistipes</i>                     | 0.030                            | 0.221 | 9.59E-01         | -0.006                           | 0.227 | 9.96E-01         |
| <i>Allisonella</i>                   | 1.085                            | 1.233 | 9.53E-01         | 2.218                            | 1.200 | 4.21E-01         |
| <i>Alloprevotella</i>                | -4.792                           | 2.935 | 5.99E-01         | -2.383                           | 2.997 | 8.21E-01         |
| <i>Alloscardovia</i>                 | -0.464                           | 1.702 | 9.55E-01         | -0.335                           | 2.841 | 9.76E-01         |
| <i>Anaerococcus</i>                  | 0.009                            | 0.489 | 9.91E-01         | 0.101                            | 0.512 | 9.73E-01         |
| <i>Anaerofilum</i>                   | 0.264                            | 0.356 | 9.53E-01         | 0.135                            | 0.366 | 9.56E-01         |
| <i>Anaerofustis</i>                  | -0.450                           | 0.300 | 6.34E-01         | -0.575                           | 0.306 | 4.21E-01         |
| <i>Anaerostipes</i>                  | 0.039                            | 0.110 | 9.55E-01         | 0.025                            | 0.113 | 9.73E-01         |
| <i>Anaerotruncus</i>                 | -0.136                           | 0.273 | 9.55E-01         | 0.395                            | 0.320 | 6.13E-01         |
| <i>Anaerovorax</i>                   | 0.391                            | 2.535 | 9.59E-01         | 0.479                            | 2.999 | 9.76E-01         |
| <i>Angelakisella</i>                 | -0.075                           | 0.328 | 9.55E-01         | -0.299                           | 0.342 | 7.97E-01         |
| <i>Atopobium</i>                     | -0.440                           | 0.335 | 7.04E-01         | -0.499                           | 0.344 | 5.10E-01         |
| <i>Bacteroides</i>                   | 0.134                            | 0.186 | 9.53E-01         | 0.293                            | 0.188 | 4.83E-01         |
| <i>Barnesiella</i>                   | -0.173                           | 0.859 | 9.55E-01         | -0.121                           | 0.929 | 9.76E-01         |
| <i>Bifidobacterium</i>               | -0.318                           | 0.207 | 6.34E-01         | -0.327                           | 0.210 | 4.83E-01         |
| <i>Bilophila</i>                     | 0.089                            | 0.255 | 9.55E-01         | 0.118                            | 0.264 | 9.31E-01         |
| <i>Blautia</i>                       | -0.084                           | 0.079 | 8.48E-01         | -0.116                           | 0.082 | 5.24E-01         |
| <i>Butyricicoccus</i>                | -0.138                           | 0.164 | 9.53E-01         | -0.112                           | 0.168 | 8.40E-01         |
| <i>Butyricimonas</i>                 | 0.127                            | 0.599 | 9.55E-01         | 0.230                            | 0.625 | 9.56E-01         |
| <i>Butyrivibrio</i>                  | 2.639                            | 2.939 | 9.53E-01         | 9.768                            | 2.997 | 4.04E-02         |
| CAG-352                              | 0.605                            | 1.198 | 9.55E-01         | 1.543                            | 1.138 | 5.37E-01         |
| CAG-56                               | 0.092                            | 0.330 | 9.55E-01         | 0.013                            | 0.346 | 9.96E-01         |
| <i>Campylobacter</i>                 | 0.731                            | 0.581 | 7.20E-01         | 0.622                            | 0.633 | 7.58E-01         |
| <i>Candidatus_Soleaferrea</i>        | -0.586                           | 0.166 | 2.39E-02         | -0.545                           | 0.165 | 4.04E-02         |
| <i>Candidatus_Stoquefichus</i>       | -0.838                           | 0.666 | 7.20E-01         | -0.076                           | 0.700 | 9.79E-01         |
| <i>Caproiciproducens</i>             | 0.798                            | 0.539 | 6.34E-01         | -0.002                           | 0.522 | 9.99E-01         |
| <i>Catabacter</i>                    | -0.308                           | 0.316 | 9.19E-01         | -0.019                           | 0.337 | 9.96E-01         |
| <i>Catenibacterium</i>               | 0.955                            | 1.679 | 9.55E-01         | 1.002                            | 1.579 | 8.50E-01         |
| <i>Christensenellaceae_R-7_group</i> | -0.176                           | 0.230 | 9.53E-01         | -0.071                           | 0.242 | 9.73E-01         |
| <i>Clostridium_sensu_stricto_1</i>   | -0.169                           | 0.237 | 9.53E-01         | -0.235                           | 0.250 | 7.72E-01         |
| <i>Collinsella</i>                   | -0.404                           | 0.247 | 5.99E-01         | -0.399                           | 0.254 | 4.83E-01         |
| <i>Coprobacillus</i>                 | -0.366                           | 0.502 | 9.53E-01         | -0.159                           | 0.528 | 9.72E-01         |
| <i>Coprobacter</i>                   | 0.844                            | 1.312 | 9.53E-01         | 0.654                            | 1.540 | 9.31E-01         |
| <i>Coprococcus_1</i>                 | -0.077                           | 0.280 | 9.55E-01         | -0.238                           | 0.290 | 8.02E-01         |
| <i>Coprococcus_2</i>                 | 0.106                            | 0.511 | 9.55E-01         | -0.372                           | 0.531 | 8.40E-01         |
| <i>Coprococcus_3</i>                 | 0.057                            | 0.215 | 9.55E-01         | 0.048                            | 0.226 | 9.73E-01         |
| <i>Corynebacterium</i>               | -0.530                           | 0.305 | 5.99E-01         | -0.676                           | 0.320 | 2.97E-01         |
| <i>Corynebacterium_1</i>             | -0.073                           | 0.858 | 9.59E-01         | -0.083                           | 1.080 | 9.96E-01         |
| <i>Cuneatibacter</i>                 | 0.337                            | 0.743 | 9.55E-01         | -1.033                           | 0.820 | 6.06E-01         |
| <i>Defluviitaleaceae_UCG-011</i>     | 0.213                            | 0.865 | 9.55E-01         | -0.842                           | 0.987 | 7.97E-01         |
| <i>Desulfovibrio</i>                 | -0.037                           | 0.603 | 9.73E-01         | 0.037                            | 0.633 | 9.96E-01         |
| <i>Dialister</i>                     | -0.268                           | 0.394 | 9.53E-01         | -0.279                           | 0.407 | 8.40E-01         |
| <i>Dielma</i>                        | -0.477                           | 0.352 | 7.04E-01         | -0.705                           | 0.362 | 4.06E-01         |
| DNF00809                             | -0.170                           | 0.248 | 9.53E-01         | -0.378                           | 0.252 | 4.88E-01         |
| <i>Dorea</i>                         | -0.087                           | 0.137 | 9.53E-01         | -0.123                           | 0.143 | 7.97E-01         |
| DTU089                               | -0.109                           | 0.268 | 9.55E-01         | -0.086                           | 0.280 | 9.72E-01         |
| <i>Eggerthella</i>                   | -0.538                           | 0.246 | 4.33E-01         | -0.527                           | 0.248 | 2.97E-01         |
| <i>Eisenbergiella</i>                | -0.163                           | 0.303 | 9.55E-01         | 0.495                            | 0.349 | 5.24E-01         |
| <i>Enterorhabdus</i>                 | 2.311                            | 2.110 | 8.48E-01         | 2.824                            | 1.937 | 5.10E-01         |
| <i>Erysipelatoclostridium</i>        | 0.036                            | 0.204 | 9.55E-01         | 0.081                            | 0.208 | 9.48E-01         |

| Genus                                | Unadjusted                       |       |                  | Adjusted <sup>b</sup>            |       |                  |
|--------------------------------------|----------------------------------|-------|------------------|----------------------------------|-------|------------------|
|                                      | log <sub>2</sub> FC <sup>a</sup> | SE    | p <sub>FDR</sub> | log <sub>2</sub> FC <sup>a</sup> | SE    | p <sub>FDR</sub> |
| <i>Erysipelotrichaceae_UCG-003</i>   | -0.323                           | 0.188 | 5.99E-01         | -0.334                           | 0.190 | 4.35E-01         |
| <i>Eubacterium</i>                   | -1.404                           | 0.587 | 3.69E-01         | -1.754                           | 0.636 | 8.97E-02         |
| <i>Ezakiella</i>                     | 0.624                            | 0.382 | 5.99E-01         | 0.086                            | 0.422 | 9.73E-01         |
| <i>F0332</i>                         | -0.770                           | 0.522 | 6.34E-01         | -0.600                           | 0.582 | 7.35E-01         |
| <i>Faecalibacterium</i>              | 0.210                            | 0.145 | 6.34E-01         | 0.229                            | 0.150 | 4.88E-01         |
| <i>Faecalitalea</i>                  | 0.159                            | 0.394 | 9.55E-01         | 0.374                            | 0.407 | 7.72E-01         |
| <i>Family_XIII_AD3011_group</i>      | -0.415                           | 0.202 | 5.44E-01         | -0.455                           | 0.201 | 2.40E-01         |
| <i>Family_XIII_UCG-001</i>           | 0.311                            | 0.290 | 8.48E-01         | 0.081                            | 0.302 | 9.73E-01         |
| <i>Fingoldia</i>                     | 0.632                            | 0.536 | 7.71E-01         | -1.094                           | 0.657 | 4.68E-01         |
| <i>Flavonifractor</i>                | -0.186                           | 0.229 | 9.53E-01         | 0.256                            | 0.220 | 6.38E-01         |
| <i>Fournierella</i>                  | -0.412                           | 0.416 | 9.10E-01         | -0.622                           | 0.406 | 4.88E-01         |
| <i>Fusicatenibacter</i>              | 0.108                            | 0.138 | 9.53E-01         | 0.120                            | 0.140 | 7.97E-01         |
| <i>Fusobacterium</i>                 | 0.351                            | 1.132 | 9.55E-01         | 0.965                            | 1.351 | 8.40E-01         |
| <i>Gallicola</i>                     | -0.035                           | 0.759 | 9.80E-01         | -0.375                           | 0.891 | 9.31E-01         |
| <i>GCA-900066225</i>                 | -0.325                           | 0.246 | 7.04E-01         | -0.313                           | 0.251 | 6.09E-01         |
| <i>GCA-900066575</i>                 | 0.102                            | 0.245 | 9.55E-01         | -0.132                           | 0.256 | 9.31E-01         |
| <i>GCA-900066755</i>                 | -0.548                           | 0.393 | 6.86E-01         | -0.472                           | 0.407 | 6.38E-01         |
| <i>Gemella</i>                       | -0.311                           | 0.226 | 6.92E-01         | -0.377                           | 0.231 | 4.68E-01         |
| <i>Gordonibacter</i>                 | -1.019                           | 0.222 | 3.82E-04         | -0.799                           | 0.222 | 1.89E-02         |
| <i>Granulicatella</i>                | 0.146                            | 0.222 | 9.53E-01         | 0.213                            | 0.231 | 7.72E-01         |
| <i>Haemophilus</i>                   | 0.071                            | 0.337 | 9.55E-01         | -0.302                           | 0.359 | 7.97E-01         |
| <i>Harryflintia</i>                  | -0.413                           | 0.490 | 9.53E-01         | -0.426                           | 0.510 | 7.97E-01         |
| <i>Holdemanella</i>                  | 0.261                            | 0.896 | 9.55E-01         | -0.217                           | 0.939 | 9.73E-01         |
| <i>Holdemania</i>                    | -0.186                           | 0.194 | 9.26E-01         | -0.098                           | 0.196 | 9.31E-01         |
| <i>Howardella</i>                    | 0.413                            | 2.161 | 9.55E-01         | 0.516                            | 2.146 | 9.73E-01         |
| <i>Hungatella</i>                    | -0.097                           | 0.301 | 9.55E-01         | 0.362                            | 0.324 | 6.71E-01         |
| <i>Hydrogenoanaerobacterium</i>      | -0.434                           | 0.860 | 9.55E-01         | -0.219                           | 1.024 | 9.73E-01         |
| <i>Intestinibacter</i>               | -0.457                           | 0.174 | 3.15E-01         | -0.482                           | 0.176 | 8.97E-02         |
| <i>Intestinimonas</i>                | 0.129                            | 0.281 | 9.55E-01         | -0.191                           | 0.280 | 8.40E-01         |
| <i>Lachnoclostridium</i>             | -0.232                           | 0.142 | 5.99E-01         | -0.202                           | 0.144 | 5.25E-01         |
| <i>Lachnospira</i>                   | -0.142                           | 0.257 | 9.55E-01         | -0.250                           | 0.269 | 7.72E-01         |
| <i>Lachnospiraceae_FCS020_group</i>  | 0.081                            | 0.216 | 9.55E-01         | 0.017                            | 0.226 | 9.96E-01         |
| <i>Lachnospiraceae_ND3007_group</i>  | 0.157                            | 0.259 | 9.55E-01         | 0.131                            | 0.268 | 9.31E-01         |
| <i>Lachnospiraceae_NK4A136_group</i> | 0.050                            | 0.254 | 9.55E-01         | -0.118                           | 0.261 | 9.31E-01         |
| <i>Lachnospiraceae_NK4B4_group</i>   | 2.394                            | 1.024 | 3.69E-01         | 3.047                            | 1.100 | 8.97E-02         |
| <i>Lachnospiraceae_UCG-001</i>       | -0.149                           | 0.336 | 9.55E-01         | -0.260                           | 0.348 | 8.40E-01         |
| <i>Lachnospiraceae_UCG-003</i>       | 0.628                            | 1.435 | 9.55E-01         | 4.678                            | 1.643 | 8.87E-02         |
| <i>Lachnospiraceae_UCG-004</i>       | 0.188                            | 0.257 | 9.53E-01         | 0.222                            | 0.266 | 7.97E-01         |
| <i>Lachnospiraceae_UCG-010</i>       | -0.050                           | 0.268 | 9.55E-01         | 0.009                            | 0.274 | 9.96E-01         |
| <i>Lactobacillus</i>                 | 0.938                            | 0.409 | 3.69E-01         | 0.213                            | 0.453 | 9.31E-01         |
| <i>Lactococcus</i>                   | -0.728                           | 0.298 | 3.69E-01         | -0.442                           | 0.324 | 5.37E-01         |
| <i>Leuconostoc</i>                   | 0.505                            | 0.601 | 9.53E-01         | 1.037                            | 0.664 | 4.83E-01         |
| <i>Marvinbryantia</i>                | 0.057                            | 0.264 | 9.55E-01         | -0.124                           | 0.273 | 9.31E-01         |
| <i>Megamonas</i>                     | 2.076                            | 1.599 | 7.04E-01         | 7.749                            | 1.629 | 3.56E-04         |
| <i>Megasphaera</i>                   | -1.882                           | 1.570 | 7.59E-01         | -3.448                           | 1.612 | 2.97E-01         |
| <i>Merdibacter</i>                   | -0.114                           | 0.546 | 9.55E-01         | 0.491                            | 0.567 | 7.97E-01         |
| <i>Methanobrevibacter</i>            | -0.537                           | 1.001 | 9.55E-01         | -0.699                           | 1.051 | 8.40E-01         |
| <i>Mogibacterium</i>                 | 2.042                            | 0.365 | 4.07E-06         | 0.891                            | 0.393 | 2.40E-01         |
| <i>Moryella</i>                      | -0.332                           | 1.821 | 9.55E-01         | -0.431                           | 2.999 | 9.76E-01         |
| <i>Murdochiella</i>                  | 0.202                            | 0.516 | 9.55E-01         | -0.256                           | 0.552 | 9.31E-01         |
| <i>Negativibacillus</i>              | -1.227                           | 0.412 | 1.33E-01         | -0.858                           | 0.436 | 4.04E-01         |
| <i>Negativicoccus</i>                | 0.122                            | 1.123 | 9.59E-01         | 0.215                            | 1.618 | 9.76E-01         |
| <i>Odoribacter</i>                   | 0.205                            | 0.363 | 9.55E-01         | 0.119                            | 0.383 | 9.72E-01         |
| <i>Olsenella</i>                     | 2.729                            | 2.100 | 7.04E-01         | -0.405                           | 2.557 | 9.76E-01         |
| <i>Oribacterium</i>                  | 0.006                            | 0.807 | 9.95E-01         | 0.020                            | 1.063 | 9.96E-01         |
| <i>Oscillibacter</i>                 | -0.413                           | 0.239 | 5.99E-01         | -0.173                           | 0.246 | 8.40E-01         |
| <i>Oscillospira</i>                  | 0.318                            | 0.480 | 9.53E-01         | 0.158                            | 0.508 | 9.72E-01         |
| <i>Oxalobacter</i>                   | 0.115                            | 0.758 | 9.59E-01         | -0.352                           | 0.722 | 9.31E-01         |
| <i>Paeniclostridium</i>              | 0.473                            | 0.866 | 9.55E-01         | -1.821                           | 1.016 | 4.21E-01         |

| Genus                                | Unadjusted                       |       |                  | Adjusted <sup>b</sup>            |       |                  |
|--------------------------------------|----------------------------------|-------|------------------|----------------------------------|-------|------------------|
|                                      | log <sub>2</sub> FC <sup>a</sup> | SE    | P <sub>FDR</sub> | log <sub>2</sub> FC <sup>a</sup> | SE    | P <sub>FDR</sub> |
| <i>Parabacteroides</i>               | 0.442                            | 0.230 | 5.44E-01         | 0.426                            | 0.235 | 4.21E-01         |
| <i>Paraprevotella</i>                | 1.384                            | 1.035 | 7.04E-01         | 0.138                            | 1.083 | 9.76E-01         |
| <i>Parasutterella</i>                | -0.599                           | 0.366 | 5.99E-01         | -0.435                           | 0.372 | 6.38E-01         |
| <i>Parvimonas</i>                    | -0.144                           | 0.358 | 9.55E-01         | -0.158                           | 0.369 | 9.31E-01         |
| <i>Pediococcus</i>                   | 0.550                            | 1.043 | 9.55E-01         | -1.321                           | 1.224 | 7.06E-01         |
| <i>Peptococcus</i>                   | -1.129                           | 0.733 | 6.34E-01         | -1.406                           | 0.851 | 4.68E-01         |
| <i>Peptoniphilus</i>                 | 0.112                            | 0.380 | 9.55E-01         | -0.329                           | 0.431 | 8.39E-01         |
| <i>Peptostreptococcus</i>            | -1.169                           | 1.159 | 9.00E-01         | -0.336                           | 1.552 | 9.73E-01         |
| <i>Phascolarctobacterium</i>         | -0.100                           | 0.513 | 9.55E-01         | -0.219                           | 0.538 | 9.37E-01         |
| <i>Phoceae</i>                       | -0.213                           | 0.283 | 9.53E-01         | -0.170                           | 0.289 | 8.91E-01         |
| <i>Porphyromonas</i>                 | 0.289                            | 0.425 | 9.53E-01         | -0.211                           | 0.452 | 9.31E-01         |
| <i>Prevotella</i>                    | 0.212                            | 0.421 | 9.55E-01         | 0.196                            | 0.444 | 9.31E-01         |
| <i>Prevotella_2</i>                  | 4.805                            | 2.938 | 5.99E-01         | 9.577                            | 2.998 | 4.23E-02         |
| <i>Prevotella_6</i>                  | -0.207                           | 0.693 | 9.55E-01         | -1.377                           | 0.772 | 4.21E-01         |
| <i>Prevotella_7</i>                  | 1.742                            | 0.750 | 3.69E-01         | 0.907                            | 0.763 | 6.38E-01         |
| <i>Prevotella_9</i>                  | 1.531                            | 0.788 | 5.44E-01         | 0.220                            | 0.844 | 9.73E-01         |
| <i>Pyramidobacter</i>                | -0.272                           | 2.065 | 9.59E-01         | -4.518                           | 2.982 | 4.88E-01         |
| <i>Raoultibacter</i>                 | -0.874                           | 0.704 | 7.20E-01         | -0.208                           | 0.788 | 9.73E-01         |
| <i>Rikenellaceae_RC9_gut_group</i>   | 1.073                            | 2.935 | 9.55E-01         | 9.385                            | 2.998 | 4.52E-02         |
| <i>Romboutsia</i>                    | -0.360                           | 0.201 | 5.99E-01         | -0.144                           | 0.213 | 8.40E-01         |
| <i>Roseburia</i>                     | -0.060                           | 0.213 | 9.55E-01         | -0.137                           | 0.216 | 8.50E-01         |
| <i>Rothia</i>                        | -0.237                           | 0.308 | 9.53E-01         | -0.153                           | 0.311 | 9.31E-01         |
| <i>Ruminiclostridium_1</i>           | 0.102                            | 1.029 | 9.59E-01         | -2.783                           | 1.158 | 1.96E-01         |
| <i>Ruminiclostridium_5</i>           | -0.114                           | 0.158 | 9.53E-01         | -0.263                           | 0.163 | 4.73E-01         |
| <i>Ruminiclostridium_6</i>           | -0.701                           | 0.353 | 5.44E-01         | -0.470                           | 0.370 | 6.06E-01         |
| <i>Ruminiclostridium_9</i>           | 0.173                            | 0.221 | 9.53E-01         | -0.042                           | 0.232 | 9.76E-01         |
| <i>Ruminococcaceae_NK4A214_group</i> | -0.321                           | 0.301 | 8.48E-01         | -0.337                           | 0.323 | 7.35E-01         |
| <i>Ruminococcaceae_UCG-002</i>       | -0.143                           | 0.263 | 9.55E-01         | -0.393                           | 0.263 | 4.88E-01         |
| <i>Ruminococcaceae_UCG-003</i>       | -0.029                           | 0.301 | 9.59E-01         | -0.309                           | 0.304 | 7.35E-01         |
| <i>Ruminococcaceae_UCG-004</i>       | -0.091                           | 0.234 | 9.55E-01         | -0.081                           | 0.242 | 9.72E-01         |
| <i>Ruminococcaceae_UCG-005</i>       | 0.036                            | 0.282 | 9.59E-01         | -0.192                           | 0.283 | 8.40E-01         |
| <i>Ruminococcaceae_UCG-007</i>       | -0.488                           | 0.448 | 8.48E-01         | -0.456                           | 0.465 | 7.58E-01         |
| <i>Ruminococcaceae_UCG-008</i>       | 0.335                            | 0.647 | 9.55E-01         | 0.146                            | 0.737 | 9.73E-01         |
| <i>Ruminococcaceae_UCG-009</i>       | 0.505                            | 0.479 | 8.51E-01         | 0.589                            | 0.484 | 6.22E-01         |
| <i>Ruminococcaceae_UCG-010</i>       | -0.102                           | 0.413 | 9.55E-01         | -0.422                           | 0.412 | 7.35E-01         |
| <i>Ruminococcaceae_UCG-011</i>       | 0.713                            | 0.787 | 9.53E-01         | -0.528                           | 0.800 | 8.40E-01         |
| <i>Ruminococcaceae_UCG-013</i>       | 0.014                            | 0.166 | 9.59E-01         | -0.293                           | 0.177 | 4.68E-01         |
| <i>Ruminococcaceae_UCG-014</i>       | -0.366                           | 0.489 | 9.53E-01         | -0.839                           | 0.495 | 4.65E-01         |
| <i>Ruminococcus_1</i>                | -0.023                           | 0.244 | 9.59E-01         | -0.030                           | 0.254 | 9.76E-01         |
| <i>Ruminococcus_2</i>                | -0.641                           | 0.440 | 6.34E-01         | -0.751                           | 0.459 | 4.68E-01         |
| <i>S5-A14a</i>                       | 0.017                            | 0.558 | 9.86E-01         | -0.489                           | 0.644 | 8.39E-01         |
| <i>Sarcina</i>                       | -0.475                           | 1.276 | 9.55E-01         | -5.593                           | 1.308 | 1.72E-03         |
| <i>Scardovia</i>                     | 0.082                            | 0.634 | 9.59E-01         | 0.001                            | 0.737 | 9.99E-01         |
| <i>Sellimonas</i>                    | -0.724                           | 0.371 | 5.44E-01         | -0.723                           | 0.379 | 4.21E-01         |
| <i>Senegalimassilia</i>              | 0.215                            | 0.862 | 9.55E-01         | 0.280                            | 0.895 | 9.72E-01         |
| <i>Shuttleworthia</i>                | 0.089                            | 0.744 | 9.59E-01         | -0.550                           | 0.809 | 8.40E-01         |
| <i>Slackia</i>                       | -0.380                           | 0.616 | 9.55E-01         | 0.123                            | 0.615 | 9.73E-01         |
| <i>Solobacterium</i>                 | -0.235                           | 0.267 | 9.53E-01         | -0.258                           | 0.272 | 7.72E-01         |
| <i>Staphylococcus</i>                | -0.228                           | 0.540 | 9.55E-01         | -0.416                           | 0.632 | 8.40E-01         |
| <i>Streptococcus</i>                 | 0.059                            | 0.170 | 9.55E-01         | -0.021                           | 0.175 | 9.76E-01         |
| <i>Subdoligranulum</i>               | -0.137                           | 0.178 | 9.53E-01         | -0.140                           | 0.186 | 8.39E-01         |
| <i>Succiniclacticum</i>              | 0.461                            | 1.499 | 9.55E-01         | 1.691                            | 1.459 | 6.38E-01         |
| <i>Sutterella</i>                    | 0.846                            | 0.571 | 6.34E-01         | 0.838                            | 0.604 | 5.25E-01         |
| <i>Terrisporobacter</i>              | -0.394                           | 0.271 | 6.34E-01         | -0.661                           | 0.278 | 1.98E-01         |
| <i>Turicibacter</i>                  | -0.243                           | 0.258 | 9.32E-01         | -0.752                           | 0.258 | 8.19E-02         |
| <i>Tyzzereella</i>                   | -0.378                           | 0.575 | 9.53E-01         | -1.138                           | 0.618 | 4.21E-01         |
| <i>Tyzzereella_3</i>                 | 0.522                            | 0.993 | 9.55E-01         | -0.500                           | 1.064 | 9.31E-01         |
| <i>Tyzzereella_4</i>                 | -0.124                           | 0.572 | 9.55E-01         | -0.026                           | 0.619 | 9.96E-01         |
| <i>UBA1819</i>                       | -0.331                           | 0.189 | 5.99E-01         | -0.009                           | 0.220 | 9.96E-01         |

| Genus              | Unadjusted                       |       |                  | Adjusted <sup>b</sup>            |       |                  |
|--------------------|----------------------------------|-------|------------------|----------------------------------|-------|------------------|
|                    | log <sub>2</sub> FC <sup>a</sup> | SE    | p <sub>FDR</sub> | log <sub>2</sub> FC <sup>a</sup> | SE    | p <sub>FDR</sub> |
| <i>UC5-1-2E3</i>   | -0.915                           | 0.525 | 5.99E-01         | -0.954                           | 0.555 | 4.54E-01         |
| <i>Unknown</i>     | -0.133                           | 0.071 | 5.99E-01         | -0.081                           | 0.085 | 7.72E-01         |
| <i>Varibaculum</i> | -0.367                           | 0.955 | 9.55E-01         | -0.327                           | 1.045 | 9.72E-01         |
| <i>Veillonella</i> | 0.397                            | 0.626 | 9.53E-01         | 0.128                            | 0.689 | 9.76E-01         |
| <i>Victivallis</i> | 1.035                            | 1.361 | 9.53E-01         | 5.172                            | 1.898 | 8.97E-02         |
| <i>Weissella</i>   | 1.339                            | 1.076 | 7.20E-01         | 0.318                            | 1.197 | 9.73E-01         |

<sup>a</sup>Interpreted as the log<sub>2</sub> fold change between those who did and did not meet recommendations (positive: increased abundance in those who met recommendations; negative: decreased abundance in those who met recommendations).

<sup>b</sup>Adjusted for maternal education, household income, location of residence, sex, child race, breastfeeding status at 1-month, BMI category at age 10, and dietary pattern at age 10. N=315 due to some missing covariates.
